# Supplementary material for: In situ variable-temperature single crystal X-ray diffraction studies of the single-crystal-to-single-crystal dehydration and rehydration of a mixed-ligand 2D zinc metal–organic framework using trimesate and 4,4′-bipyridine-N,N′-dioxide as ligands
Source: Royal Society of Chemistry journal article supplement (doi:10.1039/c5ce01297j), 2015-01-01

## SUPPORTING INFORMATION

***In situ variable-temperature single crystal X-ray diffraction studies of the single-crystal-to-single crystal dehydration and rehydration of a mixed-ligand 2D zinc metal-organic framework using trimesate and 4,4-dipyridyl-N,N'-dioxide as ligands***

---

Tayyibah Tahier and Clive L. Oliver\*

*Centre for Supramolecular Chemistry Research, Department of Chemistry, University of Cape Town, Rondebosch, 7701, South Africa*

E-mail: [Clive.Oliver@uct.ac.za](mailto:Clive.Oliver@uct.ac.za) (Dr. Clive L. Oliver)

\*Corresponding author:

Clive L. Oliver

Centre for Supramolecular Chemistry Research, Department of Chemistry, University of Cape Town, Rondebosch 7701, South Africa

E-mail: [clive.oliver@uct.ac.za](mailto:clive.oliver@uct.ac.za)

Fax: +27 21 6505195

Phone: +27 21 6503830

**Table S1** Crystal data for **1** at 104 K, 298 K, 323 K, 373 K on the same crystal, whilst 298K after heated to 373 K and at 298 K after exposed to air for 1 day is on a different crystal

|                                        | 104 K                                                         | 298K                                                          | 323K                                                          | 373 K                                                         | 298 K (after heated to 373 K)                                 | 298 K (1 day after heated to 373 K)                           |
|----------------------------------------|---------------------------------------------------------------|---------------------------------------------------------------|---------------------------------------------------------------|---------------------------------------------------------------|---------------------------------------------------------------|---------------------------------------------------------------|
| Empirical formula                      | $C_{57}H_{60}N_6O_{55}S_3Zn_9$                                | $C_{57}H_{54}N_6O_{52.2}S_3Zn_9$                              | $C_{57}H_{54}N_6O_{48.9}S_3Zn_9$                              | $C_{57}H_{42}N_6O_{42}S_3Zn_9$                                | $C_{57}H_{42}N_6O_{42}S_3Zn_9$                                | $C_{57}H_{42}N_6O_{50.95}S_3Zn_9$                             |
| Formula weight                         | 2393.62                                                       | 2326.82                                                       | 2290.93                                                       | 2167.47                                                       | 2167.47                                                       | 2310.67                                                       |
| Temperature/K                          | 104                                                           | 298                                                           | 323                                                           | 373(2)                                                        | 298(2)                                                        | 298                                                           |
| Crystal system                         | trigonal                                                      | trigonal                                                      | trigonal                                                      | trigonal                                                      | trigonal                                                      | trigonal                                                      |
| Space group                            | <i>R</i> 3                                                    | R 3                                                           |
| <i>a</i> /Å, $\alpha$ /°               | 18.816(4), 90                                                 | 18.798(19), 90                                                | 18.795(18), 90                                                | 18.889(19), 90                                                | 18.723(5), 90                                                 | 18.815(5), 90                                                 |
| <i>b</i> /Å, $\beta$ /°                | 18.816(4), 90                                                 | 18.798(19), 90                                                | 18.795(18), 90                                                | 18.889(19), 90                                                | 18.723(5), 90                                                 | 18.815(5), 90                                                 |
| <i>c</i> /Å, $\gamma$ /°               | 21.441(5), 120                                                | 21.57(2), 120                                                 | 21.47(2), 120                                                 | 21.67(2), 120                                                 | 21.353(6), 120                                                | 21.425(6), 120                                                |
| Volume/Å <sup>3</sup>                  | 6574(3)                                                       | 6602(15)                                                      | 6568(14)                                                      | 6695(15)                                                      | 6483(4)                                                       | 6568(4)                                                       |
| <i>Z</i>                               | 3                                                             | 3                                                             | 3                                                             | 3                                                             | 3                                                             | 3                                                             |
| $\rho_{\text{calc}}$ /cm <sup>3</sup>  | 1.814                                                         | 1.756                                                         | 1.738                                                         | 1.613                                                         | 1.666                                                         | 1.753                                                         |
| $\mu$ /mm <sup>-1</sup>                | 2.598                                                         | 2.581                                                         | 2.591                                                         | 2.532                                                         | 2.615                                                         | 2.594                                                         |
| F(000)                                 | 3606                                                          | 3497                                                          | 3443                                                          | 3240.0                                                        | 3240                                                          | 3455                                                          |
| Crystal size/mm <sup>3</sup>           | 0.475 × 0.344 × 0.317                                         | 0.475 × 0.344 × 0.317                                         | 0.475 × 0.344 × 0.317                                         | 0.314 × 0.344 × 0.475                                         | 0.4 × 0.388 × 0.351                                           | 0.4 × 0.388 × 0.351                                           |
| Wavelength/Å                           | 0.71073                                                       | 0.71073                                                       | 0.71073                                                       | 0.71073                                                       | 0.71073                                                       | 0.71073                                                       |
| 2 $\theta$ range for data collection/° | 4.33 to 61.336                                                | 4.334 to 61.748                                               | 3.14 to 61.81                                                 | 3.12 to 60.796                                                | 4.568 to 61.424                                               | 3.14 to 61.4                                                  |
| Index ranges                           | -25 ≤ <i>h</i> ≤ 25, -26 ≤ <i>k</i> ≤ 19, -29 ≤ <i>l</i> ≤ 30 | -25 ≤ <i>h</i> ≤ 26, -26 ≤ <i>k</i> ≤ 20, -29 ≤ <i>l</i> ≤ 31 | -25 ≤ <i>h</i> ≤ 26, -26 ≤ <i>k</i> ≤ 21, -29 ≤ <i>l</i> ≤ 31 | -22 ≤ <i>h</i> ≤ 26, -24 ≤ <i>k</i> ≤ 25, -29 ≤ <i>l</i> ≤ 30 | -26 ≤ <i>h</i> ≤ 25, -26 ≤ <i>k</i> ≤ 25, -25 ≤ <i>l</i> ≤ 30 | -25 ≤ <i>h</i> ≤ 20, -25 ≤ <i>k</i> ≤ 26, -30 ≤ <i>l</i> ≤ 25 |

|                                                |                                                                  |                                                                  |                                                                  |                                                                  |                                                                  |                                                                   |
|------------------------------------------------|------------------------------------------------------------------|------------------------------------------------------------------|------------------------------------------------------------------|------------------------------------------------------------------|------------------------------------------------------------------|-------------------------------------------------------------------|
| Reflections collected                          | 19838                                                            | 20095                                                            | 20037                                                            | 13265                                                            | 10863                                                            | 18950                                                             |
| Independent reflections                        | 7900 [ $R_{\text{int}} = 0.0233$ , $R_{\text{sigma}} = 0.0529$ ] | 7886 [ $R_{\text{int}} = 0.0301$ , $R_{\text{sigma}} = 0.0681$ ] | 7879 [ $R_{\text{int}} = 0.0383$ , $R_{\text{sigma}} = 0.0661$ ] | 7012 [ $R_{\text{int}} = 0.0476$ , $R_{\text{sigma}} = 0.1026$ ] | 7156 [ $R_{\text{int}} = 0.0403$ , $R_{\text{sigma}} = 0.1511$ ] | 12155 [ $R_{\text{int}} = 0.0306$ , $R_{\text{sigma}} = 0.0982$ ] |
| Data/restraints/parameters                     | 7900/2/408                                                       | 7886/1/390                                                       | 7879/1/378                                                       | 7012/1/354                                                       | 7156/1/354                                                       | 12155/1/384                                                       |
| Goodness-of-fit on $F^2$                       | 1.071                                                            | 1.081                                                            | 1.066                                                            | 1.024                                                            | 0.911                                                            | 1.099                                                             |
| Final R indexes [ $I \geq 2\sigma(I)$ ]        | $R_1 = 0.0383$ , $wR_2 = 0.1085$                                 | $R_1 = 0.0519$ , $wR_2 = 0.1465$                                 | $R_1 = 0.0482$ , $wR_2 = 0.1347$                                 | $R_1 = 0.0508$ , $wR_2 = 0.1377$                                 | $R_1 = 0.0556$ , $wR_2 = 0.1379$                                 | $R_1 = 0.0610$ , $wR_2 = 0.1578$                                  |
| Final R indexes [all data]                     | $R_1 = 0.0394$ , $wR_2 = 0.1090$                                 | $R_1 = 0.0608$ , $wR_2 = 0.1524$                                 | $R_1 = 0.0539$ , $wR_2 = 0.1372$                                 | $R_1 = 0.0635$ , $wR_2 = 0.1473$                                 | $R_1 = 0.0880$ , $wR_2 = 0.1590$                                 | $R_1 = 0.0738$ , $wR_2 = 0.1654$                                  |
| Largest diff. peak/hole / $e \text{ \AA}^{-3}$ | 2.49/-0.69                                                       | 1.22/-0.67                                                       | 1.00/-0.89                                                       | 0.97/-0.51                                                       | 0.92/-0.70                                                       | 0.83/-0.85                                                        |
| Flack parameter                                | 0.001(5)                                                         | 0.057(6)                                                         | 0.016(7)                                                         | -0.002(11)                                                       | 0.001(19)                                                        | 0.337(11)                                                         |
| Refined minor twin component fraction          | 0.180(2)                                                         | 0.186(1)                                                         | 0.185(3)                                                         | 0.188(1)                                                         | 0.206(4)                                                         | 0.262(1)                                                          |

**Table S2** Bond lengths [ $\text{\AA}$ ] for **1** at 104 K, 298 K, 323 K, 373 K on the same crystal, whilst 298K after heated to 373 K and at 298 K after exposed to air for 1 day is on a different crystal

| Bonded atoms |      | 104 K    | 298 K     | 323 K     | 373 K     | 298 K<br>(after heated to 373 K) | 298K after 1 day exposure to air |
|--------------|------|----------|-----------|-----------|-----------|----------------------------------|----------------------------------|
| Zn01         | O9   | 2.065(4) | 2.069(6)  | 2.077(5)  | 2.076(6)  | 2.050(6)                         | 2.069(5)                         |
| Zn01         | O3   | 2.134(4) | 2.143(6)  | 2.152(5)  | 2.200(6)  | 2.171(7)                         | 2.159(6)                         |
| Zn01         | O2   | 2.037(4) | 2.025(7)  | 2.027(6)  | 2.072(6)  | 2.059(7)                         | 2.028(6)                         |
| Zn01         | O7   | 2.097(4) | 2.093(7)  | 2.089(5)  | 2.097(5)  | 2.075(6)                         | 2.085(7)                         |
| Zn01         | O1S  | 2.158(4) | 2.141(7)  | 2.142(6)  | 2.162(6)  | 2.141(6)                         | 2.164(7)                         |
| Zn01         | O3W  | 2.093(4) | 2.089(7)  | 2.097(6)  | 2.076(6)  | 2.053(6)                         | 2.100(6)                         |
| Zn02         | O1W  | 2.091(5) | 2.115(8)  | 2.164(8)  | -         | -                                | 2.154(8)                         |
| Zn02         | O1   | 2.056(5) | 2.037(7)  | 2.015(6)  | 1.948(7)  | 1.940(8)                         | 2.032(7)                         |
| Zn02         | O2W  | 2.104(5) | 2.084(8)  | 2.079(7)  | -         | -                                | 2.069(8)                         |
| Zn02         | O3S  | 2.069(4) | 2.072(7)  | 2.053(7)  | 2.013(8)  | 2.001(8)                         | 2.089(7)                         |
| Zn02         | O6   | 2.179(5) | 2.166(8)  | 2.142(7)  | 1.979(7)  | 1.947(8)                         | 2.158(8)                         |
| Zn03         | O9   | 1.978(4) | 1.968(5)  | 1.972(5)  | 1.995(6)  | 1.962(6)                         | 1.964(6)                         |
| Zn03         | O4   | 1.939(5) | 1.942(7)  | 1.920(6)  | 1.937(7)  | 1.939(8)                         | 1.937(7)                         |
| Zn03         | O2S  | 1.990(5) | 1.970(7)  | 1.965(7)  | 1.998(7)  | 1.979(7)                         | 1.983(7)                         |
| Zn03         | O5   | 1.940(6) | 1.928(8)  | 1.909(7)  | 1.937(7)  | 1.899(7)                         | 1.922(7)                         |
| S1           | O4S  | 1.465(4) | 1.457(7)  | 1.466(7)  | 1.448(7)  | 1.439(7)                         | 1.454(8)                         |
| S1           | O1S  | 1.473(4) | 1.469(7)  | 1.471(7)  | 1.486(6)  | 1.469(6)                         | 1.468(7)                         |
| S1           | O3S  | 1.484(5) | 1.468(7)  | 1.471(7)  | 1.479(9)  | 1.468(9)                         | 1.464(7)                         |
| S1           | O2S  | 1.487(5) | 1.481(8)  | 1.483(7)  | 1.485(8)  | 1.473(9)                         | 1.484(8)                         |
| O3           | Zn01 | 2.134(4) | 2.143(6)  | 2.152(5)  | 2.200(6)  | 2.171(7)                         | 2.159(6)                         |
| O3           | C8   | 1.253(7) | 1.246(11) | 1.254(9)  | 1.242(11) | 1.224(12)                        | 1.260(10)                        |
| O2           | C7   | 1.246(7) | 1.246(11) | 1.240(10) | 1.237(10) | 1.242(12)                        | 1.244(11)                        |
| O7           | N1   | 1.335(6) | 1.348(10) | 1.350(9)  | 1.338(9)  | 1.325(9)                         | 1.334(10)                        |
| O1           | C7   | 1.261(7) | 1.248(11) | 1.243(10) | 1.281(11) | 1.244(12)                        | 1.246(11)                        |
| O8           | N2   | 1.325(6) | 1.316(10) | 1.311(10) | 1.324(10) | 1.297(9)                         | 1.322(10)                        |
| O4           | Zn03 | 1.939(5) | 1.942(7)  | 1.920(6)  | 1.937(7)  | 1.939(8)                         | 1.937(7)                         |
| O4           | C8   | 1.275(7) | 1.265(11) | 1.265(11) | 1.271(11) | 1.257(11)                        | 1.279(10)                        |
| O6           | Zn02 | 2.179(5) | 2.166(7)  | 2.166(7)  | 1.979(7)  | 1.947(8)                         | 2.158(7)                         |
| O6           | C9   | 1.231(8) | 1.238(12) | 1.238(12) | 1.262(14) | 1.261(15)                        | 1.239(12)                        |
| N2           | C17  | 1.357(8) | 1.337(13) | 1.337(13) | 1.316(12) | 1.332(12)                        | 1.368(13)                        |
| N2           | C18  | 1.352(8) | 1.330(13) | 1.330(13) | 1.376(12) | 1.354(12)                        | 1.329(13)                        |
| N1           | C10  | 1.360(8) | 1.342(13) | 1.342(13) | 1.365(12) | 1.349(12)                        | 1.351(13)                        |
| N1           | C14  | 1.352(8) | 1.342(13) | 1.342(13) | 1.357(12) | 1.336(12)                        | 1.334(14)                        |
| C11          | C10  | 1.381(8) | 1.361(14) | 1.361(14) | 1.375(13) | 1.366(13)                        | 1.356(14)                        |
| C11          | C12  | 1.406(8) | 1.377(14) | 1.377(14) | 1.416(12) | 1.397(13)                        | 1.389(14)                        |
| C1           | C2   | 1.394(8) | 1.395(11) | 1.395(11) | 1.394(12) | 1.381(13)                        | 1.398(11)                        |

|       |       |          |           |           |           |           |           |
|-------|-------|----------|-----------|-----------|-----------|-----------|-----------|
| C1    | C6    | 1.391(8) | 1.387(11) | 1.387(11) | 1.384(11) | 1.382(12) | 1.394(11) |
| C1    | C7    | 1.509(7) | 1.496(11) | 1.496(11) | 1.520(11) | 1.519(12) | 1.504(11) |
| C16   | C15   | 1.409(8) | 1.385(13) | 1.385(13) | 1.392(12) | 1.365(13) | 1.394(13) |
| C16   | C17   | 1.386(8) | 1.390(14) | 1.390(14) | 1.389(13) | 1.387(14) | 1.372(14) |
| C3    | C2    | 1.387(8) | 1.384(11) | 1.384(11) | 1.389(11) | 1.399(13) | 1.400(11) |
| C3    | C4    | 1.390(8) | 1.395(11) | 1.395(11) | 1.416(11) | 1.397(13) | 1.395(11) |
| C3    | C8    | 1.510(8) | 1.499(11) | 1.499(11) | 1.518(12) | 1.504(14) | 1.479(11) |
| C15   | C12   | 1.474(8) | 1.478(12) | 1.478(12) | 1.490(11) | 1.488(11) | 1.496(13) |
| C15   | C19   | 1.394(8) | 1.387(15) | 1.387(15) | 1.384(13) | 1.364(14) | 1.391(14) |
| C6    | C5    | 1.395(9) | 1.375(12) | 1.375(12) | 1.396(13) | 1.378(13) | 1.366(12) |
| O5    | Zn03  | 1.940(6) | 1.928(7)  | 1.928(7)  | 1.937(7)  | 1.899(7)  | 1.922(7)  |
| O5    | C9    | 1.282(8) | 1.271(13) | 1.271(13) | 1.291(12) | 1.271(14) | 1.283(12) |
| C12   | C13   | 1.411(8) | 1.399(13) | 1.399(13) | 1.407(12) | 1.389(13) | 1.395(14) |
| C13   | C14   | 1.376(8) | 1.378(14) | 1.378(14) | 1.366(13) | 1.360(13) | 1.376(14) |
| C4    | C5    | 1.384(8) | 1.368(12) | 1.368(12) | 1.394(13) | 1.387(13) | 1.383(12) |
| C19   | C18   | 1.373(8) | 1.367(14) | 1.367(14) | 1.382(13) | 1.374(14) | 1.360(14) |
| C5    | C9    | 1.492(8) | 1.498(12) | 1.498(12) | 1.510(11) | 1.499(12) | 1.496(12) |
| Zn02  | O9    | 2.079(4) | 2.067(6)  | 2.056(5)  | 1.989(6)  | 1.981(6)  | 2.061(6)  |
| Zn02* | Zn03* | 3.219(1) | 3.219(1)  | 3.215(1)  | 3.137(4)  | 3.101(2)  | 3.219(2)  |

\* These are non-bonded distances

**Figure S1. DSC and TGA graphs of 1**

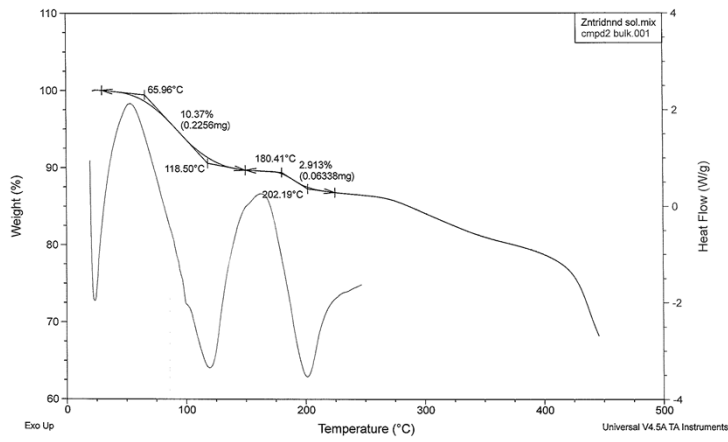

Sample: cmpd sol ex  
 Size: 2.1840 mg  
**TGA**  
 File: H:\Paper\cmpd 2 sol ex.003  
 Run Date: 27-Feb-2015 09:19  
 Instrument: TGA Q500 V20.13 Build

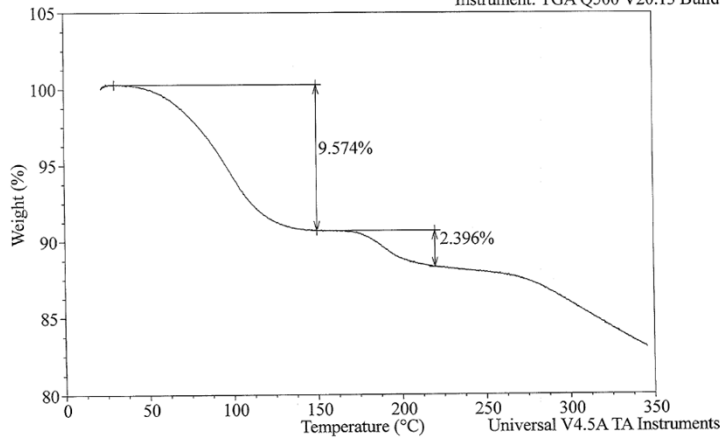

Sample: cmpd sol ex  
 Size: 2.1840 mg  
 Method: 400B/10  
 Comment: 80C vac overnight  
**TGA**  
 File: H:\Paper\cmpd 2 sol ex.003  
 Operator: Jay  
 Run Date: 27-Feb-2015 09:19  
 Instrument: TGA Q500 V20.13 Build 39

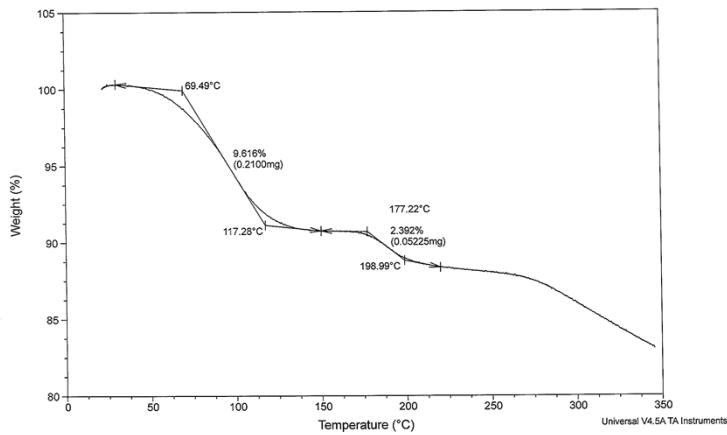

**Figure S2.** TGA graphs for rehydration experiment: (a) as-synthesized MOF (b) the immediate reheat and (c) after 24 hours of being exposed to a humid atmosphere

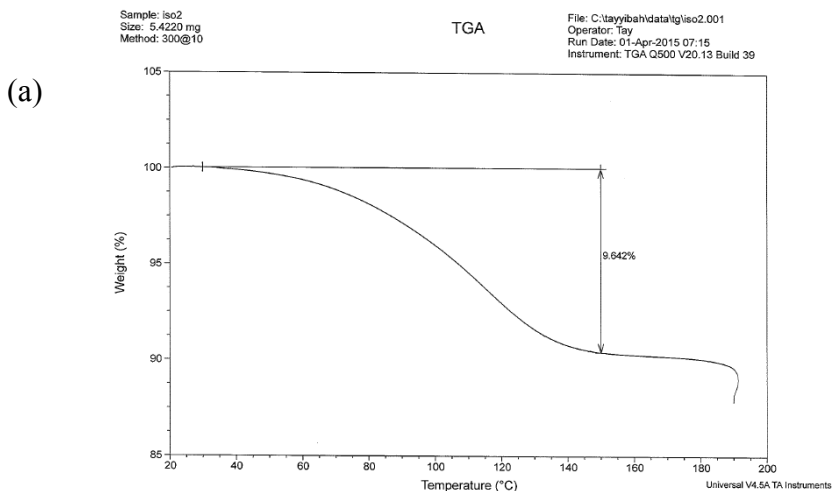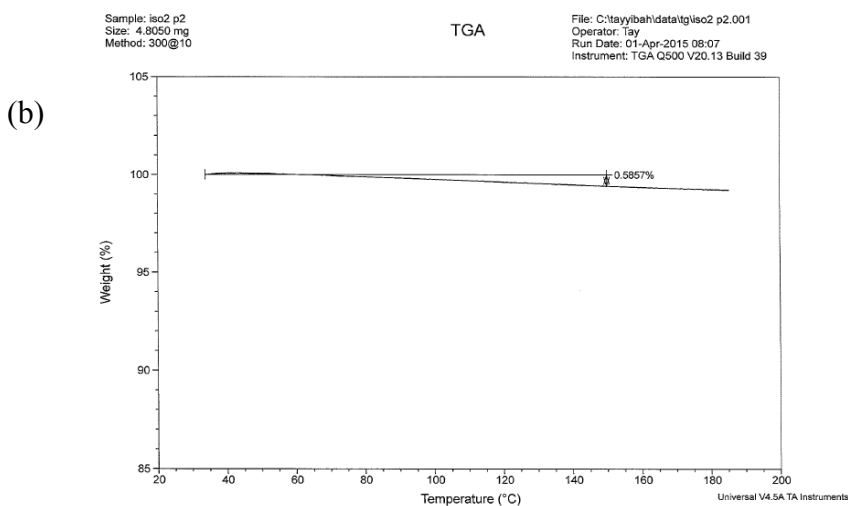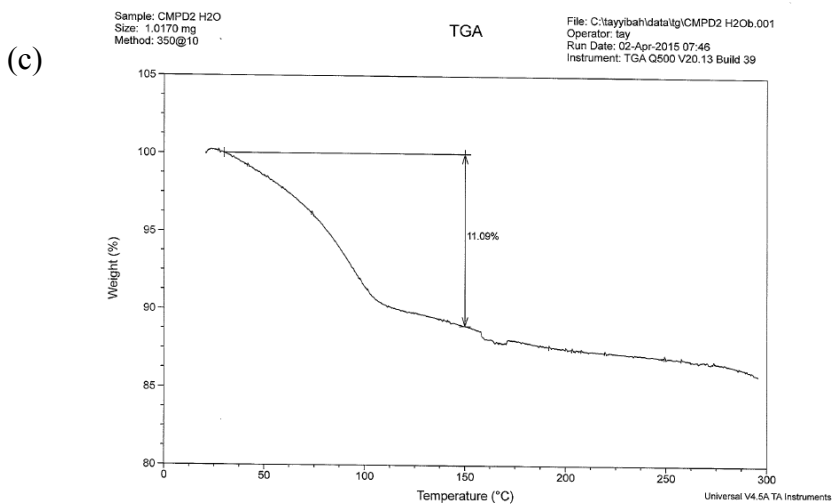

**Figure S3.** FT-IR spectra for the (a) 2D MOF (b) trimesic acid and (c) 4,4'-bipyridine-N,N'-dioxide

(a)

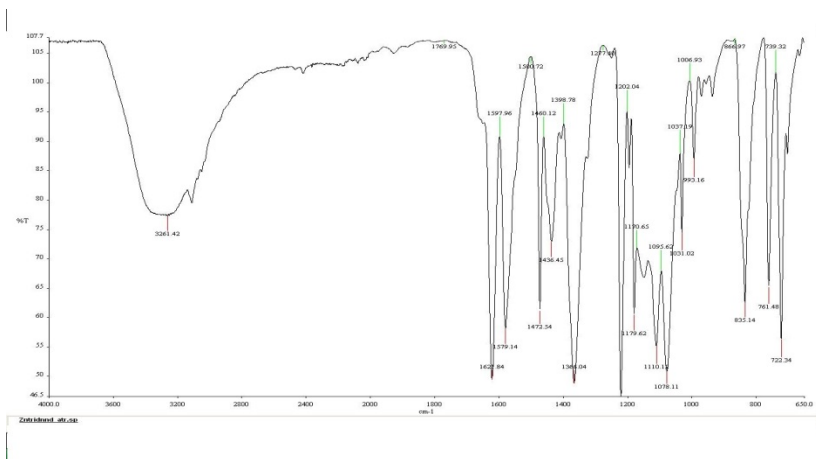

(b)

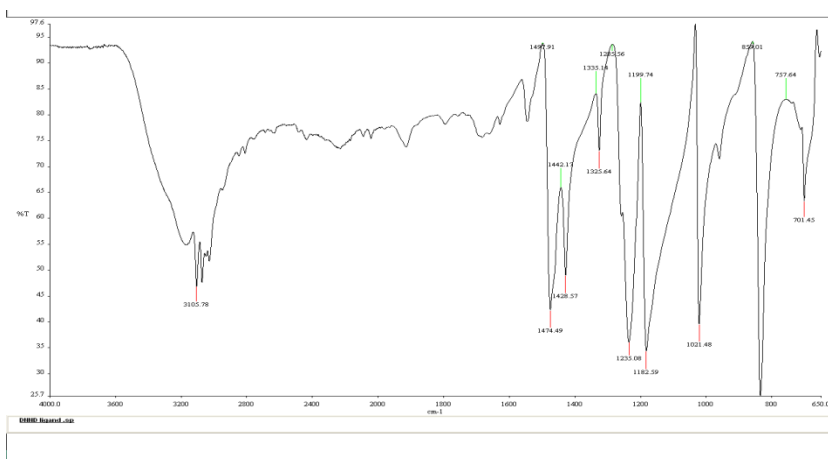

(c)

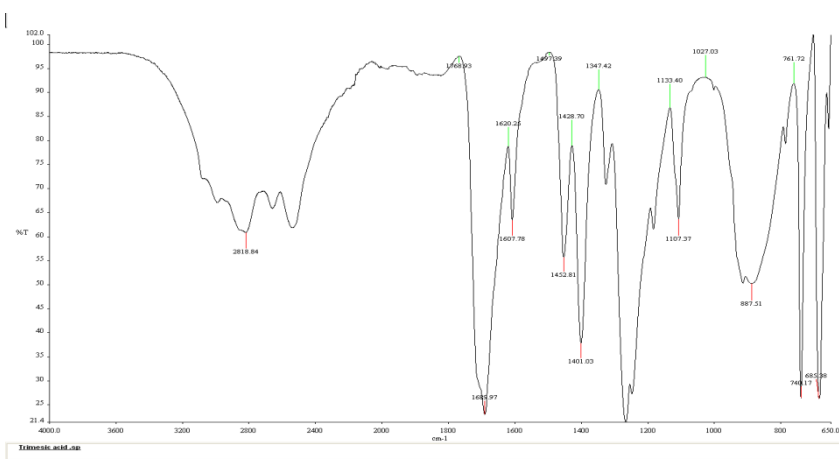

Supplement: c5ce01297j1.pdf [file c5ce01297j1.pdf]
